# Supplementary material for: Long-Term Effects of COVID-19 on Workers in Health and Social Services in Germany
Source: MDPI journal article supplement (doi:10.3390/ijerph19126983), 2022-06-07
Supplement: s1 [file s1]

**Table S1. Symptoms of post-COVID-19 syndrome (n=1406/72.8%)**

| <b>Symptoms</b>                |          | <b>PCS<br/>n / %</b> |
|--------------------------------|----------|----------------------|
| Fatigue/ exhaustion            | Mild     | 404 / 28.7           |
|                                | Moderate | 519 / 36.9           |
|                                | Severe   | 242 / 17.2           |
| Concentration/ memory problems | Mild     | 470 / 33.4           |
|                                | Moderate | 391 / 27.8           |
|                                | Severe   | 133 / 9.5            |
| Shortness of breath            | Mild     | 384 / 27.3           |
|                                | Moderate | 308 / 21.9           |
|                                | Severe   | 102 / 7.3            |
| Headache                       | Mild     | 297 / 21.1           |
|                                | Moderate | 216 / 15.4           |
|                                | Severe   | 67 / 4.8             |
| Loss of taste/ smell           | Mild     | 245 / 17.4           |
|                                | Moderate | 164 / 11.7           |
|                                | Severe   | 126 / 9.0            |
| Joint / limb pain              | Mild     | 187 / 13.3           |
|                                | Moderate | 204 / 14.5           |
|                                | Severe   | 77 / 5.5             |
| Cough                          | Mild     | 207 / 10.7           |
|                                | Moderate | 80 / 5.7             |
|                                | Severe   | 11 / 0.8             |
| Rhinitis                       | Mild     | 122 / 8.7            |
|                                | Moderate | 43 / 3.1             |
|                                | Severe   | 4 / 0.3              |
| Sore throat                    | Mild     | 102 / 7.3            |
|                                | Moderate | 31 / 2.2             |
|                                | Severe   | 4 / 0.3              |
| Abdominal pain                 | Mild     | 79 / 5.6             |
|                                | Moderate | 36 / 2.6             |
|                                | Severe   | 8 / 0.6              |
| Diarrhoea                      | Mild     | 59 / 4.2             |
|                                | Moderate | 27 / 1.9             |
|                                | Severe   | 8 / 0.6              |
| Nausea/ vomiting               | Mild     | 60 / 4.3             |
|                                | Moderate | 26 / 1.8             |
|                                | Severe   | 3 / 0.2              |
| Fever                          | Mild     | 16 / 1.1             |
|                                | Moderate | 9 / 0.6              |
|                                | Severe   | 1 / 0.1              |
